# Supplementary material for: Detection Rate of Prostate Cancer in Repeat Biopsy after an Initial Negative Magnetic Resonance Imaging/Ultrasound-Guided Biopsy
Source: MDPI journal article supplement (doi:10.3390/diagnostics13101761), 2023-05-17
Supplement: s1 [file s1]

# Supplementary Material S1

## Prostate MRI Protocol

| Sequence             | Orien-<br>tation | TE<br>(ms)   | TR<br>(ms) | Section<br>Thick-<br>ness<br>(mm) | FOV read<br>(mm)/FoV<br>Phase % | Base (mm)/<br>Phase %<br>(section%)<br>Resolution | Avg.    | Phase<br>Encod-<br>ing | Additional<br>Features                  | Additional<br>Features   |
|----------------------|------------------|--------------|------------|-----------------------------------|---------------------------------|---------------------------------------------------|---------|------------------------|-----------------------------------------|--------------------------|
| T2 blade             | sag              | 105          | 5000       | 3                                 | 200/100%                        | 320/100%                                          | 1       | F-H                    | Blade<br>Coverage 81%                   |                          |
| T1 tse dixon         | cor              | 13           | 773        | 4                                 | 360/90%                         | 320/100%                                          | 1       | F-H                    | TF 5                                    |                          |
| T2 tse               | tra              | 145          | 8080       | 3                                 | 200/100%                        | 320/100%                                          | 3       | R-L                    | TF 27                                   |                          |
| T2 tse               | cor              | 145          | 8000       | 3                                 | 200/100%                        | 320/80%                                           | 3       | F-H                    | TF 19                                   |                          |
| epi_diff SPAIR       | tra              | 48           | 3300       | 3                                 | 280/74%                         | 140/100%                                          | 2,2,4,6 | A-P                    | phase partial<br>Fourier 7/8            | b = 50/500/<br>1000/1500 |
| dynamic DCE          |                  |              |            |                                   |                                 |                                                   |         |                        |                                         |                          |
| T1_twist_DCE_<br>Dyn | tra              | 4.45         | 3          | 3                                 | 300/87%                         | 256/85%/65%                                       | 1       | R-L                    | 35 meas./<br>Temporal<br>Resolution 5 s | 30 sections<br>per slab  |
| T1_vibe_dixon        | tra              | 2.4/3.<br>69 | 5.4        | 1.2                               | 380/68%                         | 384/80%/50%                                       | 1       | A-P                    | W-images/F-<br>images                   | 224 sections<br>per slab |

Note.—General preparations: MRI-coil: body array coil; patients placed supine. TE = echo time, TR = repetition time, FOV = field of view, TSE = turbo-spin-echo, DCE = dynamic contrast enhanced, SPAIR = spectral adiabatic inversion recovery, FOV = field of view, TF = turbo factor, tra/sag/cor = transverse/sagittal/coronal.
